# Supplementary material for: Effects of Xuefu Zhuyu Decoction on Cell Migration and Ocular Tumor Invasion in Drosophila
Source: Hindawi journal article supplement (doi:10.1155/2020/5463652), 2020-01-01
Supplement: f1 [file 5463652.f1.zip]

Archive with 5 entries (5 files):
- mat.5463652.v3.pdf
- XFZY S1_BMRI_3058310.eps
- XFZY S2_BMRI_3058311.eps
- XFZY S3_BMRI_3058312.eps
- XFZY S4_BMRI_3058313.eps
